# Supplementary material
Source: PubMed Central journal article supplement (PMC11024793)
Supplement: jama-e245000-s001.pdf [file jama-e245000-s001.pdf]

## Data Sharing Statement

Nguyen. Outcomes of the Main Residency Match for Applicants With Disability. *JAMA*.  
Published April 17, 2024. doi:10.1001/jama.2024.5000

### Data

**Data available:** No
